# Supplementary material
Source: PubMed Central journal article supplement (PMC6357797)
Supplement: kwy256mendolawebmaterialfinal.pdf [file kwy256mendolawebmaterialfinal.pdf]

**Ambient volatile organic compounds and racial/ethnic disparities in gestational diabetes mellitus: Are Asian/Pacific Islander women at greater risk?**

Andrew D. Williams, Katherine L. Grantz, Cuilin Zhang, Carrie Nobles, Seth Sherman, and Pauline Mendola

**Supplemental Web Content**

**Web Table 1.** Demographic Characteristics by Gestational Diabetes Mellitus and race/ethnicity in the Consortium on Safe Labor (n = 220,065)

**Web Table 2.** Spearman correlation coefficients for volatile organic compounds at 3 months prior to conception

**Web Table 3.** Spearman correlation coefficients for volatile organic compounds for first trimester of pregnancy

**Web Table 4.** Distribution of pregnancies in the Consortium on Safe Labor by VOC exposure level and race/ethnicity

**Web Table 5.** Associations between exposure to High VOC ( $\geq 75^{\text{th}}$  percentile) and gestational diabetes in the Consortium on Safe Labor (2002-2008) – Pre-pregnancy BMI excluded from models



|                             |            |              |            |              |            |              |           |             |           |             |
|-----------------------------|------------|--------------|------------|--------------|------------|--------------|-----------|-------------|-----------|-------------|
| University<br>Affiliated    | 1573 (1.4) | 28116 (25.7) | 1327 (2.7) | 30708 (62.5) | 1463 (3.8) | 22047 (57.6) | 329 (3.6) | 3387 (37.3) | 280 (1.9) | 4153 (29.1) |
| Community:<br>Teaching      | 2986 (2.7) | 62524 (57.1) | 816 (1.6)  | 16166 (32.9) | 930 (2.4)  | 12872 (33.6) | 541 (5.9) | 4406 (48.5) | 547 (3.8) | 8501 (59.5) |
| Community: Non-<br>teaching | 418 (0.3)  | 13779 (12.6) | 5 (0.0)    | 71 (0.1)     | 69 (0.1)   | 860 (2.2)    | 29 (0.3)  | 376 (4.1)   | 27 (0.1)  | 759 (5.3)   |

---

**Web Table 2.** Spearman correlation coefficients for volatile organic compounds at 3 months prior to conception (n= 220,065) <sup>a</sup>

|                      | <b>Benzene</b> | <b>Ethylbenzene</b> | <b>MTB Ether</b> | <b>N-hexane</b> | <b>EMK</b> | <b>m-xylene</b> | <b>o-xylene</b> | <b>p-xylene</b> | <b>propene</b> | <b>Sesquiterpene</b> | <b>Toluene</b> | <b>Styrene</b> | <b>1,3 butadiene</b> | <b>Cyclohexane</b> |
|----------------------|----------------|---------------------|------------------|-----------------|------------|-----------------|-----------------|-----------------|----------------|----------------------|----------------|----------------|----------------------|--------------------|
| <b>Benzene</b>       | 1.00           | 0.96                | 0.61             | 0.97            | 0.87       | 0.95            | 0.92            | 0.95            | 0.53           | 0.67                 | 0.90           | 0.25           | 0.27                 | 0.84               |
| <b>Ethylbenzene</b>  |                | 1.00                | 0.63             | 0.94            | 0.92       | 0.98            | 0.93            | 0.99            | 0.57           | 0.72                 | 0.92           | 0.32           | 0.34                 | 0.84               |
| <b>MTB Ether</b>     |                |                     | 1.00             | 0.66            | 0.81       | 0.54            | 0.40            | 0.65            | 0.92           | 0.76                 | 0.35           | 0.81           | 0.81                 | 0.30               |
| <b>N-hexane</b>      |                |                     |                  | 1.00            | 0.86       | 0.94            | 0.90            | 0.93            | 0.54           | 0.72                 | 0.89           | 0.28           | 0.29                 | 0.85               |
| <b>EMK</b>           |                |                     |                  |                 | 1.00       | 0.85            | 0.77            | 0.93            | 0.77           | 0.72                 | 0.74           | 0.59           | 0.61                 | 0.65               |
| <b>m-xylene</b>      |                |                     |                  |                 |            | 1.00            | 0.97            | 0.97            | 0.45           | 0.67                 | 0.96           | 0.20           | 0.21                 | 0.91               |
| <b>o-xylene</b>      |                |                     |                  |                 |            |                 | 1.00            | 0.92            | 0.31           | 0.57                 | 0.99           | 0.05           | 0.07                 | 0.95               |
| <b>p-xylene</b>      |                |                     |                  |                 |            |                 |                 | 1.00            | 0.59           | 0.73                 | 0.90           | 0.36           | 0.37                 | 0.82               |
| <b>propene</b>       |                |                     |                  |                 |            |                 |                 |                 | 1.00           | 0.70                 | 0.26           | 0.84           | 0.86                 | 0.17               |
| <b>Sesquiterpene</b> |                |                     |                  |                 |            |                 |                 |                 |                | 1.00                 | 0.55           | 0.57           | 0.56                 | 0.50               |
| <b>Toluene</b>       |                |                     |                  |                 |            |                 |                 |                 |                |                      | 1.00           | 0.01           | 0.03                 | 0.95               |
| <b>Styrene</b>       |                |                     |                  |                 |            |                 |                 |                 |                |                      |                | 1.00           | 0.98                 | -0.04              |
| <b>1,3 butadiene</b> |                |                     |                  |                 |            |                 |                 |                 |                |                      |                |                | 1.00                 | -0.04              |

a. All correlations significant at  $p < .0001$

**Web Table 3.** Spearman correlation coefficients for volatile organic compounds for first trimester of pregnancy<sup>a</sup> (n= 220,065)

|                     | Benzene | Ethylbenzene | MTB Ether | N-hexane | EMK  | m-xylene | o-xylene | p-xylene | propene | Sesquiterpene | Toluene | Styrene | 1,3 butadiene | Cyclohexane |
|---------------------|---------|--------------|-----------|----------|------|----------|----------|----------|---------|---------------|---------|---------|---------------|-------------|
| <b>Benzene</b>      | 1.00    | 0.96         | 0.64      | 0.97     | 0.88 | 0.95     | 0.92     | 0.95     | 0.57    | 0.68          | 0.90    | 0.25    | 0.27          | 0.83        |
| <b>Ethylbenzene</b> |         | 1.00         | 0.65      | 0.94     | 0.93 | 0.98     | 0.94     | 0.99     | 0.60    | 0.71          | 0.92    | 0.32    | 0.34          | 0.84        |
| <b>MTB Ether</b>    |         |              | 1.00      | 0.69     | 0.81 | 0.57     | 0.44     | 0.67     | 0.91    | 0.77          | 0.41    | 0.77    | 0.76          | 0.35        |
| <b>N-hexane</b>     |         |              |           | 1.00     | 0.86 | 0.93     | 0.90     | 0.93     | 0.58    | 0.74          | 0.89    | 0.28    | 0.28          | 0.85        |
| <b>EMK</b>          |         |              |           |          | 1.00 | 0.87     | 0.79     | 0.93     | 0.78    | 0.71          | 0.76    | 0.56    | 0.58          | 0.67        |
| <b>m-xylene</b>     |         |              |           |          |      | 1.00     | 0.98     | 0.97     | 0.49    | 0.67          | 0.96    | 0.21    | 0.23          | 0.91        |

|                      |      |      |      |      |      |      |      |       |
|----------------------|------|------|------|------|------|------|------|-------|
| <b>o-xylene</b>      | 1.00 | 0.93 | 0.37 | 0.59 | 0.99 | 0.08 | 0.10 | 0.95  |
| <b>p-xylene</b>      |      | 1.00 | 0.62 | 0.73 | 0.91 | 0.35 | 0.37 | 0.83  |
| <b>propene</b>       |      |      | 1.00 | 0.69 | 0.33 | 0.78 | 0.80 | 0.22  |
| <b>Sesquiterpene</b> |      |      |      | 1.00 | 0.57 | 0.55 | 0.53 | 0.52  |
| <b>Toluene</b>       |      |      |      |      | 1.00 | 0.04 | 0.06 | 0.95  |
| <b>Styrene</b>       |      |      |      |      |      | 1.00 | 0.98 | -0.01 |
| <b>1,3 butadiene</b> |      |      |      |      |      |      | 1.00 | -0.01 |
| <b>Cyclohexane</b>   |      |      |      |      |      |      |      | 1.00  |

a. All correlations significant at  $p < .0001$

**Web Table 4.** Distribution of pregnancies in the Consortium on Safe Labor by VOC exposure level and race/ethnicity (n= 220,065)

| <b>White (N: 109,396)</b> | <b>Black (N: 49,093)</b> | <b>Hispanic (N: 38,241)</b> | <b>Asian/Pacific Islander (N: 9,068)</b> |
|---------------------------|--------------------------|-----------------------------|------------------------------------------|
|---------------------------|--------------------------|-----------------------------|------------------------------------------|

|                             | n (% White)                |                             | n (% Black)                |                             | n (% Hispanic)             |                             | n (% Asian/Pacific Islander) |                             |
|-----------------------------|----------------------------|-----------------------------|----------------------------|-----------------------------|----------------------------|-----------------------------|------------------------------|-----------------------------|
|                             | Low (< 75 <sup>th</sup> %) | High (≥ 75 <sup>th</sup> %) | Low (< 75 <sup>th</sup> %) | High (≥ 75 <sup>th</sup> %) | Low (< 75 <sup>th</sup> %) | High (≥ 75 <sup>th</sup> %) | Low (< 75 <sup>th</sup> %)   | High (≥ 75 <sup>th</sup> %) |
| <b>Preconception VOCs</b>   |                            |                             |                            |                             |                            |                             |                              |                             |
| <i>Benzene</i>              | 82,430 (75.35)             | 26,966 (24.65)              | 37,300 (75.98)             | 11,793 (24.02)              | 28,916 (75.62)             | 9325 (24.38)                | 4356 (48.04)                 | 4712 (51.96)                |
| <i>1,3 Butadiene</i>        | 87765 (80.23)              | 21631 (19.77)               | 33234 (67.70)              | 15859 (32.30)               | 25786 (67.43)              | 12455 (32.57)               | 6928 (76.40)                 | 2140 (23.60)                |
| <i>Ethylbenzene</i>         | 82,094 (75.04)             | 27302 (24.96)               | 37816 (77.03)              | 11277 (22.97)               | 28980 (75.78)              | 9261 (24.22)                | 4160 (45.88)                 | 4908 (54.12)                |
| <i>Cyclohexane</i>          | 83897 (76.69)              | 25499 (23.31)               | 36689 (74.73)              | 12404 (25.27)               | 28423 (74.33)              | 9818 (25.67)                | 4768 (52.58)                 | 4300 (47.42)                |
| <i>MTB Ether</i>            | 87053 (79.58)              | 22343 (20.42)               | 35432 (72.17)              | 13661 (27.83)               | 25552 (66.82)              | 12689 (33.18)               | 5315 (58.61)                 | 3753 (41.39)                |
| <i>N-Hexane</i>             | 82146 (75.09)              | 27250 (24.91)               | 37188 (75.75)              | 11905 (24.25)               | 29265 (76.53)              | 8976 (23.47)                | 4368 (48.17)                 | 4700 (51.83)                |
| <i>Ethyl Methyl Ketone</i>  | 85074 (77.77)              | 24322 (22.23)               | 34886 (71.06)              | 14207 (28.94)               | 28023 (73.28)              | 10218 (26.72)               | 5565 (61.37)                 | 3503 (38.63)                |
| <i>m-xylene</i>             | 82158 (75.10)              | 27238 (24.90)               | 37851 (77.10)              | 11242 (22.90)               | 28911 (75.60)              | 9330 (24.40)                | 4153 (45.80)                 | 4915 (54.20)                |
| <i>o-xylene</i>             | 82098 (75.05)              | 27298 (24.95)               | 37841 (77.08)              | 11252 (22.92)               | 28997 (75.83)              | 9244 (24.17)                | 4200 (46.32)                 | 4868 (53.68)                |
| <i>p-xylene</i>             | 82460 (75.38)              | 26936 (24.62)               | 37504 (76.39)              | 11589 (23.61)               | 28865 (75.48)              | 9376 (24.52)                | 4305 (47.47)                 | 4763 (52.53)                |
| <i>Propene</i>              | 93422 (76.26)              | 25974 (23.74)               | 35088 (71.47)              | 14005 (28.53)               | 29119 (76.15)              | 9122 (23.85)                | 5554 (61.25)                 | 3514 (38.75)                |
| <i>Sesquiterpene</i>        | 84134 (76.91)              | 25262 (23.09)               | 37354 (76.09)              | 11739 (23.91)               | 27344 (71.50)              | 10897 (28.50)               | 4570 (50.40)                 | 4498 (49.60)                |
| <i>Styrene</i>              | 89621 (81.92)              | 19775 (18.08)               | 31976 (65.13)              | 17117 (34.87)               | 25127 (65.71)              | 13114 (34.29)               | 7003 (77.23)                 | 2065 (22.77)                |
| <i>Toluene</i>              | 82015 (74.97)              | 27381 (25.03)               | 37862 (77.12)              | 11231 (22.88)               | 29042 (75.94)              | 9199 (24.06)                | 4224 (46.58)                 | 4844 (53.42)                |
| <b>First Trimester VOCs</b> |                            |                             |                            |                             |                            |                             |                              |                             |
| <i>Benzene</i>              | 82245 (75.18)              | 27151 (24.82)               | 37394 (79.17)              | 11699 (23.83)               | 28914 (75.61)              | 9327 (24.39)                | 4423 (48.78)                 | 4645 (51.22)                |
| <i>1,3 Butadiene</i>        | 87628 (80.10)              | 21768 (19.90)               | 33834 (68.92)              | 15259 (31.08)               | 25236 (65.99)              | 13005 (34.01)               | 6949 (76.63)                 | 2119 (23.37)                |
| <i>Ethylbenzene</i>         | 82021 (74.98)              | 27375 (25.02)               | 37801 (77.00)              | 11292 (23.00)               | 29048 (75.96)              | 9193 (24.04)                | 4187 (46.17)                 | 4881 (53.83)                |
| <i>Cyclohexane</i>          | 84737 (77.46)              | 24659 (22.54)               | 36510 (74.37)              | 12583 (25.63)               | 28013 (73.25)              | 10228 (26.75)               | 4809 (53.03)                 | 4259 (46.97)                |

|                            |               |               |               |               |               |               |              |              |
|----------------------------|---------------|---------------|---------------|---------------|---------------|---------------|--------------|--------------|
| <i>MTB Ether</i>           | 85573 (78.22) | 23823 (21.83) | 36141 (73.62) | 12952 (26.38) | 26301 (68.78) | 11940 (31.22) | 5032 (55.49) | 4036 (44.51) |
| <i>N-Hexane</i>            | 82127 (75.07) | 27269 (24.93) | 37321 (76.02) | 11772 (23.98) | 29094 (76.08) | 9147 (23.92)  | 4393 (48.45) | 4675 (51.55) |
| <i>Ethyl Methyl Ketone</i> | 83262 (76.11) | 26134 (23.89) | 39525 (73.18) | 13168 (26.82) | 28687 (75.02) | 9554 (24.98)  | 5241 (57.80) | 3827 (42.20) |
| <i>m-xylene</i>            | 82011 (74.97) | 27385 (25.03) | 37858 (77.11) | 11235 (22.89) | 29028 (75.91) | 9213 (24.09)  | 4170 (45.99) | 4898 (54.01) |
| <i>o-xylene</i>            | 82119 (75.07) | 27277 (24.93) | 37889 (77.18) | 11204 (22.82) | 28998 (75.83) | 9243 (24.17)  | 4184 (46.11) | 4887 (53.89) |
| <i>p-xylene</i>            | 81974 (74.93) | 27422 (25.07) | 37744 (76.88) | 11349 (23.12) | 29131 (76.18) | 9110 (23.82)  | 4237 (46.72) | 4831 (53.28) |
| <i>Propene</i>             | 82187 (75.13) | 27209 (24.87) | 35566 (72.45) | 13527 (27.55) | 29813 (77.96) | 8428 (22.04)  | 5416 (59.73) | 3652 (40.27) |
| <i>Sesquiterpene</i>       | 83771 (76.58) | 25625 (23.42) | 37625 (76.64) | 11468 (23.36) | 27164 (71.03) | 11077 (28.97) | 4582 (50.53) | 4486 (49.47) |
| <i>Styrene</i>             | 89618 (81.92) | 19778 (18.08) | 32709 (66.63) | 16384 (33.37) | 24414 (63.84) | 2184 (24.08)  | 6884 (75.92) | 2184 (24.08) |
| <i>Toluene</i>             | 82117 (75.06) | 27279 (24.94) | 37956 (77.31) | 11137 (22.69) | 28986 (75.80) | 9255 (24.20)  | 4178 (46.07) | 4890 (53.93) |

---

Other race/ethnicity not reported due to heterogeneity of the group.



**Web Table 5.** Associations between exposure to High VOC ( $\geq 75^{\text{th}}$  percentile) and gestational diabetes in the Consortium on Safe Labor (2002-2008) – Pre-pregnancy BMI excluded from models

| VOC                        | White<br>N= 109,396 |                         | Black<br>N=49,093 |                         | Hispanic<br>N=38,241 |                         | Asian/Pacific Islander<br>N=9,068 |                           |  |
|----------------------------|---------------------|-------------------------|-------------------|-------------------------|----------------------|-------------------------|-----------------------------------|---------------------------|--|
|                            | OR                  | 99% CI                  | OR                | 99% CI                  | OR                   | 99% CI                  | OR                                | 99% CI                    |  |
| <i>Preconception</i>       |                     |                         |                   |                         |                      |                         |                                   |                           |  |
| <b>Benzene</b>             | 1.31                | 1.15, 1.50 <sup>b</sup> | 1.18              | 0.99, 1.42              | 1.13                 | 0.94, 1.37              | 1.45                              | 1.16, 1.81 <sup>b,c</sup> |  |
| <b>1,3 Butadiene</b>       | 1.02                | 0.94, 1.11              | 1.03              | 0.91, 1.17              | 0.92                 | 0.81, 1.04 <sup>c</sup> | 0.96                              | 0.76, 1.20                |  |
| <b>Ethylbenzene</b>        | 1.43                | 1.22, 1.69 <sup>b</sup> | 1.27              | 1.04, 1.55 <sup>b</sup> | 1.30                 | 1.05, 1.60 <sup>b</sup> | 1.60                              | 1.25, 2.04 <sup>b,c</sup> |  |
| <b>Cyclohexane</b>         | 1.14                | 1.03, 1.25 <sup>b</sup> | 1.02              | 0.87, 1.19              | 1.02                 | 0.88, 1.17              | 1.30                              | 1.06, 1.59 <sup>b,c</sup> |  |
| <b>MTB Ether</b>           | 1.18                | 1.09, 1.28 <sup>b</sup> | 1.12              | 0.99, 1.28              | 0.97                 | 0.86, 1.09              | 1.27                              | 1.06, 1.54 <sup>b</sup>   |  |
| <b>N-Hexane</b>            | 1.35                | 1.21, 1.51 <sup>b</sup> | 1.20              | 1.02, 1.41 <sup>b</sup> | 1.17                 | 1.00, 1.39 <sup>b</sup> | 1.50                              | 1.22, 1.85 <sup>b,c</sup> |  |
| <b>Ethyl Methyl Ketone</b> | 1.21                | 1.11, 1.32 <sup>b</sup> | 1.12              | 0.98, 1.29              | 1.04                 | 0.91, 1.19              | 1.24                              | 1.03, 1.51 <sup>b</sup>   |  |
| <b>m-xylene</b>            | 1.39                | 1.18, 1.63 <sup>b</sup> | 1.25              | 1.03, 1.54 <sup>b</sup> | 1.23                 | 1.00, 1.52 <sup>b</sup> | 1.52                              | 1.19, 1.94 <sup>b,c</sup> |  |
| <b>o-xylene</b>            | 1.24                | 1.07, 1.44 <sup>b</sup> | 1.08              | 0.89, 1.31              | 1.12                 | 0.92, 1.37              | 1.40                              | 1.11, 1.77 <sup>b,c</sup> |  |
| <b>p-xylene</b>            | 1.35                | 1.19, 1.54 <sup>b</sup> | 1.21              | 1.01, 1.44 <sup>b</sup> | 1.20                 | 1.01, 1.42 <sup>b</sup> | 1.48                              | 1.19, 1.85 <sup>b,c</sup> |  |
| <b>Propene</b>             | 1.14                | 1.06, 1.23 <sup>b</sup> | 1.06              | 0.93, 1.20              | 0.91                 | 0.79, 1.03              | 1.28                              | 1.06, 1.55 <sup>b,c</sup> |  |
| <b>Sesquiterpene</b>       | 1.19                | 1.10, 1.30 <sup>b</sup> | 1.13              | 0.99, 1.29              | 0.98                 | 0.86, 1.11              | 1.43                              | 1.18, 1.74 <sup>b,c</sup> |  |
| <b>Styrene</b>             | 1.02                | 0.93, 1.12              | 1.04              | 0.91, 1.18              | 0.94                 | 0.82, 1.06              | 0.91                              | 0.72, 1.15                |  |
| <b>Toluene</b>             | 1.20                | 1.04, 1.39 <sup>b</sup> | 1.05              | 0.87, 1.28              | 1.08                 | 0.89, 1.32              | 1.36                              | 1.08, 1.71 <sup>b,c</sup> |  |
| <i>First Trimester</i>     |                     |                         |                   |                         |                      |                         |                                   |                           |  |
| <b>Benzene</b>             | 1.20                | 1.05, 1.36 <sup>b</sup> | 1.08              | 0.90, 1.29              | 1.06                 | 0.89, 1.27              | 1.34                              | 1.08, 1.65 <sup>b,c</sup> |  |
| <b>1,3 Butadiene</b>       | 0.98                | 0.89, 1.07              | 0.92              | 0.81, 1.05              | 0.87                 | 0.77, 1.00 <sup>c</sup> | 0.84                              | 0.66, 1.06 <sup>c</sup>   |  |
| <b>Ethylbenzene</b>        | 1.22                | 1.03, 1.43 <sup>b</sup> | 1.07              | 0.87, 1.31              | 1.09                 | 0.88, 1.34              | 1.36                              | 1.07, 1.74 <sup>b,c</sup> |  |
| <b>Cyclohexane</b>         | 1.02                | 0.93, 1.12              | 0.98              | 0.84, 1.14              | 0.94                 | 0.81, 1.08              | 1.13                              | 0.92, 1.38 <sup>c</sup>   |  |
| <b>MTB Ether</b>           | 1.11                | 1.02, 1.20 <sup>b</sup> | 1.03              | 0.90, 1.18              | 0.91                 | 0.81, 1.03              | 1.29                              | 1.07, 1.55 <sup>b,c</sup> |  |
| <b>N-Hexane</b>            | 1.19                | 1.06, 1.33 <sup>b</sup> | 1.05              | 0.89, 1.24              | 1.04                 | 0.88, 1.23              | 1.38                              | 1.13, 1.69 <sup>b,c</sup> |  |
| <b>Ethyl Methyl Ketone</b> | 1.16                | 1.06, 1.26 <sup>b</sup> | 1.06              | 0.92, 1.23              | 0.97                 | 0.84, 1.11              | 1.22                              | 1.01, 1.48 <sup>b</sup>   |  |
| <b>m-xylene</b>            | 1.14                | 0.96, 1.35              | 1.00              | 0.81, 1.24              | 1.01                 | 0.81, 1.26              | 1.28                              | 0.99, 1.64 <sup>c</sup>   |  |
| <b>o-xylene</b>            | 1.09                | 0.92, 1.28              | 0.95              | 0.77, 1.18              | 0.97                 | 0.78, 1.21              | 1.23                              | 0.96, 1.58 <sup>c</sup>   |  |
| <b>p-xylene</b>            | 1.14                | 0.98, 1.33              | 1.02              | 0.84, 1.24              | 1.01                 | 0.83, 1.23              | 1.29                              | 1.02, 1.62 <sup>b,c</sup> |  |
| <b>Propene</b>             | 1.11                | 1.03, 1.20 <sup>b</sup> | 0.99              | 0.87, 1.12              | 0.96                 | 0.84, 1.10              | 1.27                              | 1.06, 1.53 <sup>b,c</sup> |  |
| <b>Sesquiterpene</b>       | 1.14                | 1.04, 1.24 <sup>b</sup> | 1.08              | 0.94, 1.24              | 0.92                 | 0.81, 1.04              | 1.36                              | 1.12, 1.65 <sup>b,c</sup> |  |
| <b>Styrene</b>             | 1.01                | 0.91, 1.11              | 0.98              | 0.86, 1.12              | 0.90                 | 0.79, 1.03 <sup>c</sup> | 0.89                              | 0.70, 1.12                |  |
| <b>Toluene</b>             | 1.11                | 0.94, 1.30              | 0.96              | 0.78, 1.19              | 0.98                 | 0.79, 1.22              | 1.24                              | 0.96, 1.58 <sup>c</sup>   |  |

- a. Model adjusted for maternal race, maternal age, insurance status, marital status, parity, site, hospital type. Other race/ethnicity group included in analysis, but stratum specific results not reported here due to heterogeneity of the population.
- b. Statistically significant estimates.
- c. Significant interaction term at  $p < 0.01$  for VOCs and race/ethnicity (reference: non-Hispanic white)
